# Supplementary material
Source: Research Square preprint supplement (doi:10.21203/rs.3.rs-8955565/v1)
Supplement: Supplementary file 1 [file 0a808344ae73a1ef7681b48f.pdf]

# Supplementary material for “Substantial spatial heterogeneity in growing season dynamics across northern environments”

Mika Rantanen<sup>1\*</sup>, Pekka Niittynen<sup>2</sup>, Matti Kämäräinen<sup>1</sup>, Julia Kemppinen<sup>3,4</sup>, Tuuli Rissanen<sup>4</sup>, Vilna Tyystjärvi<sup>5</sup>, Miska Luoto<sup>6</sup> and Juha Aalto<sup>1</sup>

<sup>1</sup>Finnish Meteorological Institute, Helsinki, Finland

<sup>2</sup>Water, Energy and Environmental Engineering Research Unit, University of Oulu, Oulu, Finland.

<sup>3</sup>Botany and Mycology Unit, Finnish Museum of Natural History, University of Helsinki, P.O. Box 00014, Helsinki, Finland

<sup>4</sup>Department of Organismal and Evolutionary Biology, Faculty of Biological and Environmental Sciences, University of Helsinki, P.O. Box 00014, Helsinki, Finland

<sup>5</sup>Institute of Crop Science and Resource Conservation, University of Bonn, Karlrobert-Kreiten-Strasse 13, 53115 Bonn, Germany

<sup>6</sup>Department of Geosciences and Geography, University of Helsinki, Helsinki, Finland

\*Correspondence to: [mika.rantanen@fmi.fi](mailto:mika.rantanen@fmi.fi)

**Table S1.** Median, absolute maximum and absolute minimum values of the growing season variables. The values are derived from the full dataset, covering the period 2020–2024. GDD is calculated with the 5 °C threshold.

|            | GS <sub>beg</sub> |        |        | GS <sub>end</sub> |        |        | GS <sub>len</sub> |     |     | GDD (°C days) |     |      |
|------------|-------------------|--------|--------|-------------------|--------|--------|-------------------|-----|-----|---------------|-----|------|
|            | Med               | Min    | Max    | Med               | Min    | Max    | Med               | Min | Max | Med           | Min | Max  |
| <b>KIL</b> | 3 Jun             | 9 May  | 6 Jul  | 12 Sep            | 24 Aug | 30 Sep | 96                | 61  | 133 | 542           | 250 | 1005 |
| <b>RAS</b> | 3 Jun             | 10 May | 4 Aug  | 12 Sep            | 28 Aug | 20 Sep | 95                | 41  | 126 | 517           | 104 | 986  |
| <b>VÄR</b> | 24 May            | 8 May  | 10 Jun | 20 Sep            | 31 Aug | 11 Oct | 120               | 90  | 147 | 823           | 461 | 1229 |

**Table S2.** Slopes and p-values of the predictors for Kilpisjärvi. Statistically significant (at 5 % level) relationships are bolded.

|        | GS <sub>beg</sub> |         | GS <sub>end</sub> |         | GDD           |         |
|--------|-------------------|---------|-------------------|---------|---------------|---------|
|        | Slope             | P-value | Slope             | P-value | Slope         | P-value |
| DEM    | <b>0.014</b>      | 0       | <b>-0.025</b>     | 0       | <b>-0.497</b> | 0       |
| PISR9  | <b>-0.001</b>     | 0.001   | <b>0.001</b>      | 0       | <b>0.022</b>  | 0       |
| TPI-50 | 0.003             | 0.766   | 0.01              | 0.118   | <b>-0.33</b>  | 0.001   |
| SWI-16 | 0.001             | 0.128   | 0.001             | 0.083   | -0.011        | 0.155   |
| WE500  | -0.01             | 0.243   | <b>0.019</b>      | 0       | <b>0.289</b>  | 0       |
| MBI    | <b>-0.004</b>     | 0       | 0                 | 0.37    | 0.01          | 0.195   |
| CC     | -0.018            | 0.501   | -0.025            | 0.115   | <b>-0.549</b> | 0.031   |
| SMT    | <b>0.448</b>      | 0       | <b>0.063</b>      | 0       | <b>-1.371</b> | 0       |

**Table S3.** Slopes and p-values of the predictors for Rásttigáisá. Statistically significant (at 5 % level) relationships are bolded.

|        | GS <sub>beg</sub> |         | GS <sub>end</sub> |         | GDD           |         |
|--------|-------------------|---------|-------------------|---------|---------------|---------|
|        | Slope             | P-value | Slope             | P-value | Slope         | P-value |
| DEM    | <b>0.026</b>      | 0.007   | <b>-0.017</b>     | 0       | <b>-0.607</b> | 0       |
| PISR9  | -0.001            | 0.418   | 0.001             | 0.071   | 0.013         | 0.39    |
| TPI-50 | <b>0.16</b>       | 0.002   | 0.017             | 0.347   | 0.092         | 0.819   |
| SWI-16 | -0.003            | 0.342   | -0.001            | 0.265   | -0.007        | 0.789   |
| WE500  | <b>-0.086</b>     | 0.007   | -0.007            | 0.541   | 0.202         | 0.44    |
| MBI    | 0                 | 0.842   | -0.001            | 0.341   | 0.002         | 0.909   |
| SMT    | <b>0.717</b>      | 0       | 0.008             | 0.662   | <b>-2.943</b> | 0       |

**Table S4.** Slopes and p-values of the predictors for Värriö. Statistically significant (at 5 % level) relationships are bolded.

|        | GS <sub>beg</sub> |         | GS <sub>end</sub> |         | GDD           |         |
|--------|-------------------|---------|-------------------|---------|---------------|---------|
|        | Slope             | P-value | Slope             | P-value | Slope         | P-value |
| DEM    | <b>0.017</b>      | 0.03    | <b>-0.05</b>      | 0.002   | -0.518        | 0.076   |
| PISR9  | <b>-0.002</b>     | 0.001   | <b>0.002</b>      | 0.023   | <b>0.047</b>  | 0.017   |
| TPI-50 | 0.009             | 0.738   | 0.001             | 0.983   | 0.979         | 0.326   |
| SWI-16 | 0.001             | 0.198   | <b>-0.005</b>     | 0.024   | <b>-0.094</b> | 0.013   |
| WE500  | -0.014            | 0.119   | 0.007             | 0.68    | -0.065        | 0.842   |
| MBI    | 0                 | 0.791   | 0.001             | 0.686   | <b>0.09</b>   | 0.011   |
| CC     | 0.017             | 0.478   | -0.085            | 0.085   | -1.75         | 0.06    |
| SMT    | 0.112             | 0.122   | 0.067             | 0.634   | 1.625         | 0.537   |

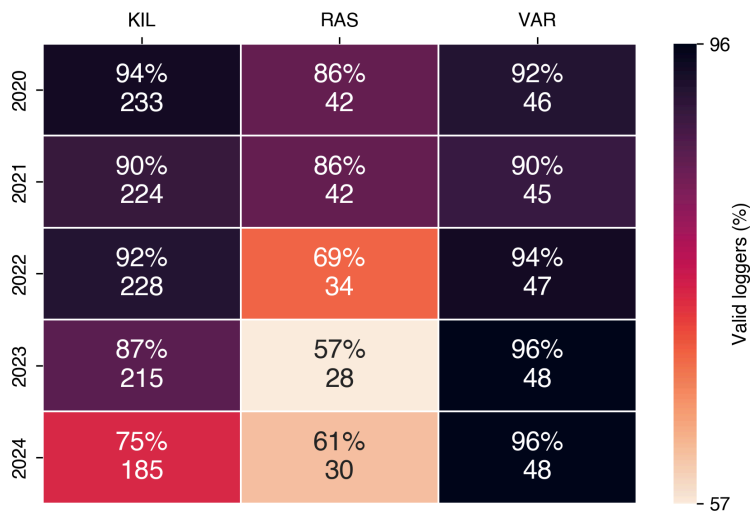

**Figure S1.** Heatmap showing the percentage and the actual number of loggers with less than 5 % imputed data at each area in 2020–2024.

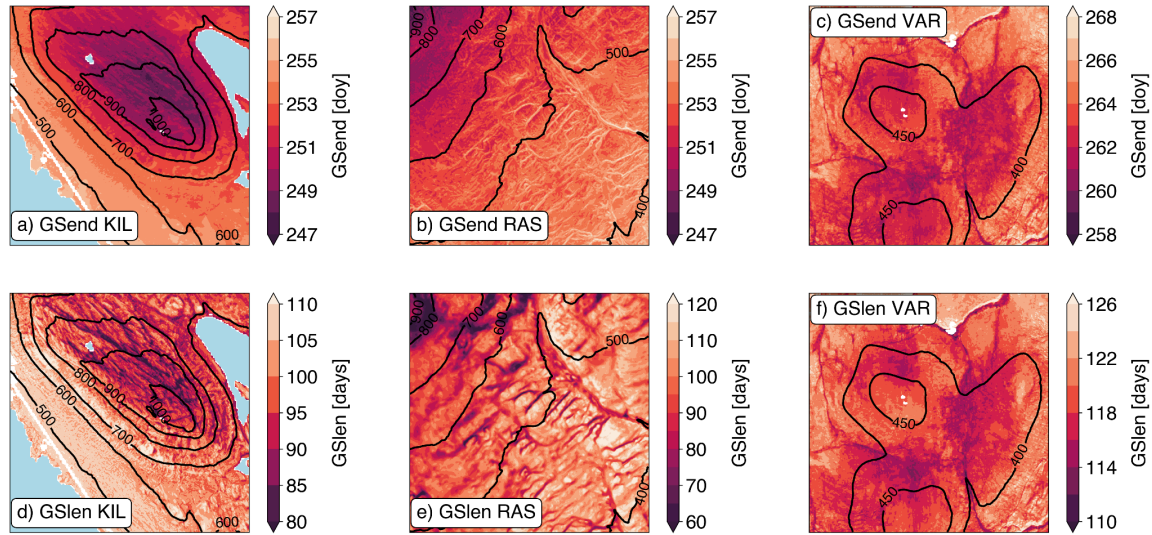

**Figure S2.** Predicted spatial variability in the average  $GS_{end}$  (a-c) and  $GS_{len}$  (d-f) in Kilpisjärvi (left), Rásttigáisá (middle) and Värriö (right).  $GS_{end}$  is based on the linear model at 10 m x 10 m resolution.  $GS_{len}$  is calculated as the difference between  $GS_{end}$  and  $GS_{beg}$ . Black contours show the elevation every 100 metres. The domains are 3 km x 3 km, and their locations in the landscape are shown in Fig. 1.

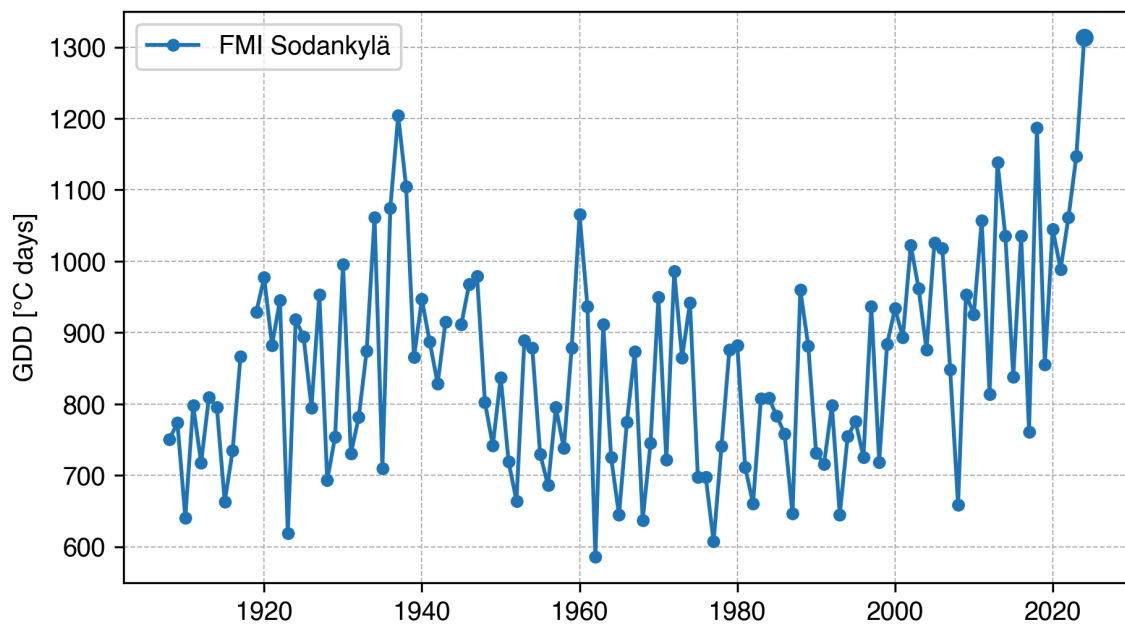

**Figure S3.** Century-scale context of growing seasons in northern Fennoscandia. The graph shows GDD from FMI Sodankylä Tähtelä weather station in 1908–2024.

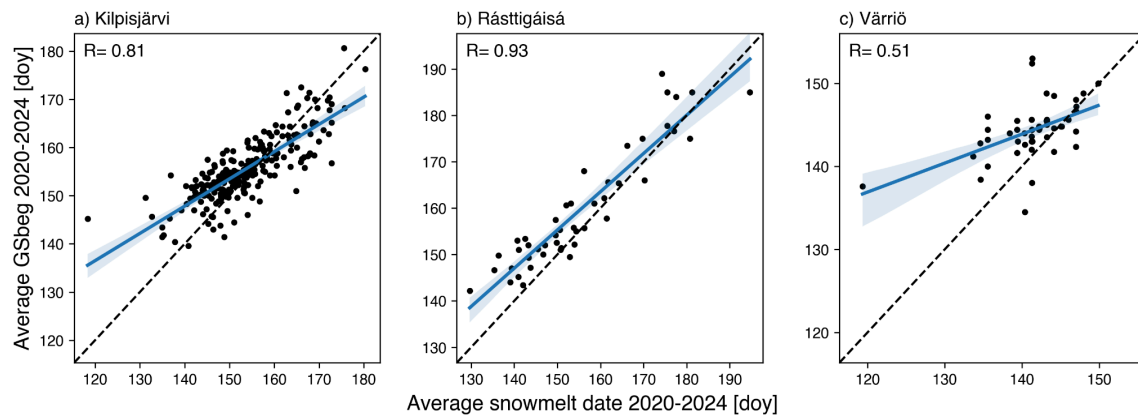

**Figure S4.** Relationship between snowmelt timing and the onset of the growing season. The x-axis shows the average snowmelt date and the y-axis shows the average GS<sub>beg</sub> date. The values are averages over five years 2020–2024. The black dashed line marks 1:1 line, and blue line the least squares regression with 95 % confidence interval as shading.
